CORRECTION

# Correction: Development and fecundity performance of *Grapholita molesta* and *Grapholita dimorpha* (Lepidoptera: Tortricidae) on different immature fruits

The PLOS ONE Staff

The images for Figs 1, 2, 4 and 5 are incorrectly switched. The image that appears as Fig 1 should be Fig 5, and the image that appears as Fig 5 should be Fig 1. The image that appears as Fig 2 should be Fig 4, and the image that appears as Fig 4 should be Fig 2. The figure captions appear in the correct order. The publisher apologizes for the error.

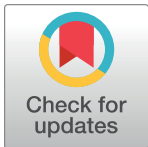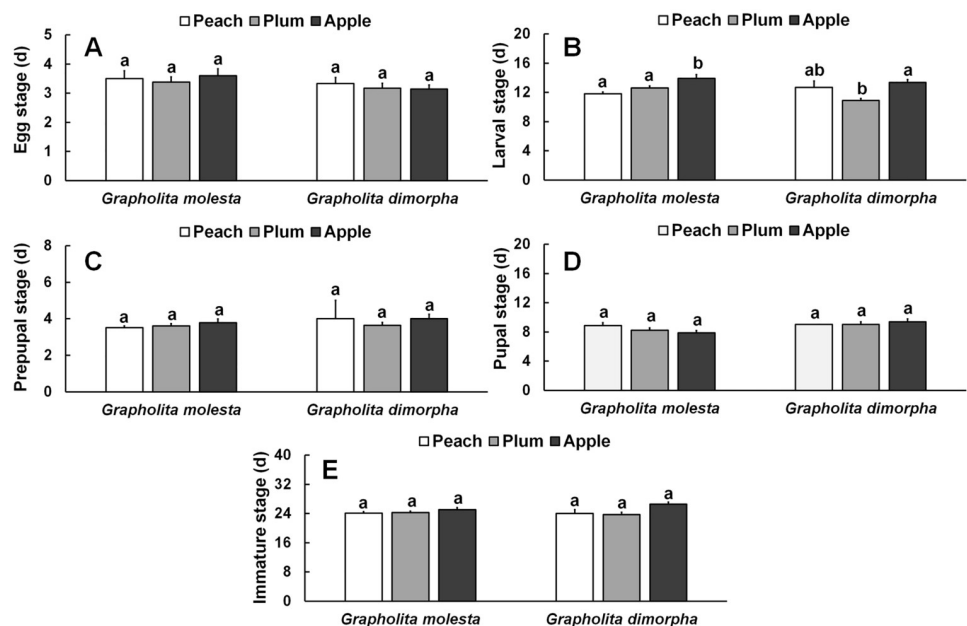

**Fig 1.** Duration (d ± SE) of each stage of *Grapholita molesta* (n = 76 for peach, n = 52 for plum, and n = 36 for apple) and *Grapholita dimorpha* (n = 30 for peach, n = 32 for plum, and n = 30 for apple) reared on different fruits under laboratory conditions. A) Egg stage, B) Larval stage, C) Prepupal stage, D) Pupal stage, and E) Immature stage.

<https://doi.org/10.1371/journal.pone.0219401.g001>

OPEN ACCESS

**Citation:** The PLOS ONE Staff (2019) Correction: Development and fecundity performance of *Grapholita molesta* and *Grapholita dimorpha* (Lepidoptera: Tortricidae) on different immature fruits. PLoS ONE 14(7): e0219401. <https://doi.org/10.1371/journal.pone.0219401>

**Published:** July 2, 2019

**Copyright:** © 2019 The PLOS ONE Staff. This is an open access article distributed under the terms of the [Creative Commons Attribution License](https://creativecommons.org/licenses/by/4.0/), which permits unrestricted use, distribution, and reproduction in any medium, provided the original author and source are credited.

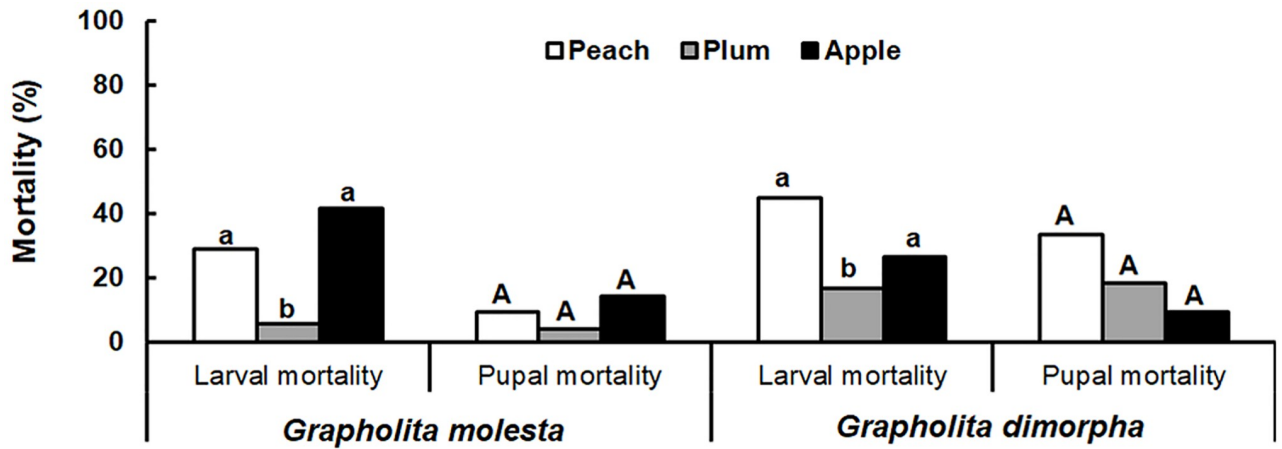

Fig 2. Larval and pupal mortality of *Grapholita molesta* and *Grapholita dimorpha*.

<https://doi.org/10.1371/journal.pone.0219401.g002>

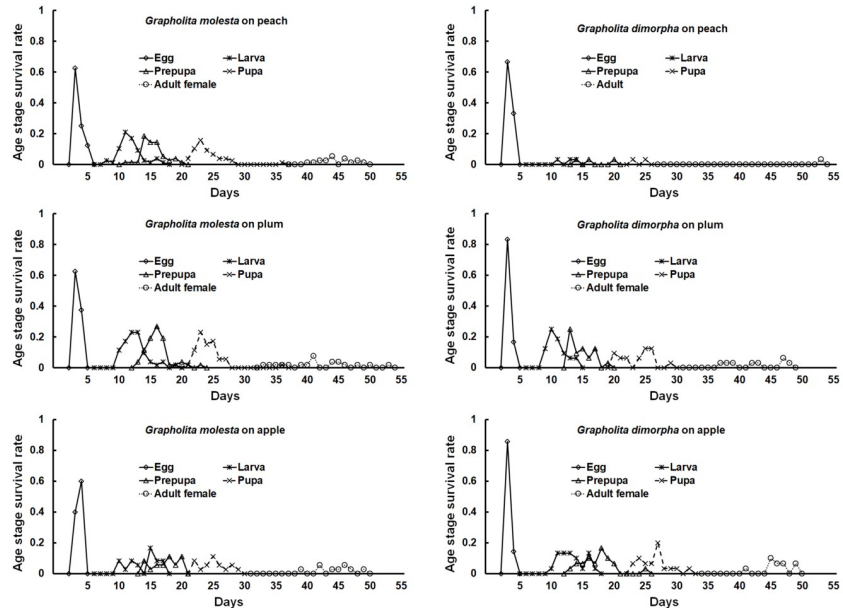

Fig 4. Age-stage survival ( $S_{xj}$ ) of *Grapholita molesta* and *Grapholita dimorpha* on peach, plum, and apple fruit.

<https://doi.org/10.1371/journal.pone.0219401.g003>

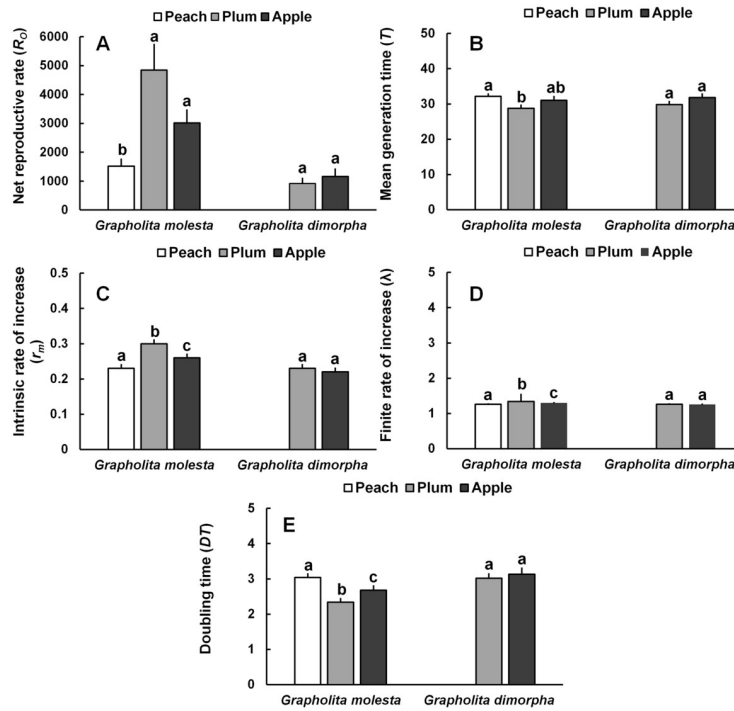

**Fig 5. Life table parameters of *Grapholita molesta* and *Grapholita dimorpha* reared on different fruits.** A) Net productive rate, B) Mean generation time, C) Intrinsic rate of increase, D) Finite rate of increase, and E) Doubling time. Means followed by the same letter in a column are not significantly different, Student's *t*-test for pairwise group comparison at  $P < 0.05$ .  $R_0$ , Net reproductive rate; T, Mean generation time; DT, Doubling time;  $\lambda$ , Finite rate of increase;  $r_m$ , Intrinsic rate of increase.

<https://doi.org/10.1371/journal.pone.0219401.g004>

## Reference

1. Sarker S, Lim UT (2019) Development and fecundity performance of *Grapholita molesta* and *Grapholita dimorpha* (Lepidoptera: Tortricidae) on different immature fruits. PLoS ONE 14(5): e0217492. <https://doi.org/10.1371/journal.pone.0217492> PMID: 31150441
